# Supplementary material
Source: publisher figshare collection journal article supplement (https://acs.figshare.com/ndownloader/files/5151439)
Supplement: Supplementary file 1 [file 5151439]

data_ata32

_audit_creation_method            SHELXL-97
_chemical_name_systematic
;
  ?
;
_chemical_name_common             ?
_chemical_melting_point           ?
_chemical_formula_moiety          ?
_chemical_formula_sum
  'C39 H48 O12'
_chemical_formula_weight          708.77

loop_
  _atom_type_symbol
  _atom_type_description
  _atom_type_scat_dispersion_real
  _atom_type_scat_dispersion_imag
  _atom_type_scat_source
  'C'  'C'   0.0181   0.0091
  'International Tables Vol C Tables 4.2.6.8 and 6.1.1.4'
  'H'  'H'   0.0000   0.0000
  'International Tables Vol C Tables 4.2.6.8 and 6.1.1.4'
  'O'  'O'   0.0492   0.0322
  'International Tables Vol C Tables 4.2.6.8 and 6.1.1.4'

_symmetry_cell_setting            orthorhombic
_symmetry_space_group_name_H-M    'P b c a'

loop_
  _symmetry_equiv_pos_as_xyz
  'x, y, z'
  'x+1/2, -y+1/2, -z'
  '-x, y+1/2, -z+1/2'
  '-x+1/2, -y, z+1/2'
  '-x, -y, -z'
  '-x-1/2, y-1/2, z'
  'x, -y-1/2, z-1/2'
  'x-1/2, y, -z-1/2'

_cell_length_a                    11.0750(10)
_cell_length_b                    18.989(3)
_cell_length_c                    23.195(2)
_cell_angle_alpha                 90.00
_cell_angle_beta                  90.00
_cell_angle_gamma                 90.00
_cell_volume                      4878.0(10)
_cell_formula_units_Z             4
_cell_measurement_temperature     296(2)
_cell_measurement_reflns_used     ?
_cell_measurement_theta_min       ?
_cell_measurement_theta_max       ?

_exptl_crystal_description        ?
_exptl_crystal_colour             ?
_exptl_crystal_size_max           0.25
_exptl_crystal_size_mid           0.25
_exptl_crystal_size_min           0.12
_exptl_crystal_density_meas       ?
_exptl_crystal_density_diffrn     0.965
_exptl_crystal_density_method     'not measured'
_exptl_crystal_F_000              1512
_exptl_absorpt_coefficient_mu     0.589
_exptl_absorpt_correction_type    'empirical method psi-scan'
_exptl_absorpt_correction_T_min   0.8667
_exptl_absorpt_correction_T_max   0.9327
_exptl_absorpt_process_details    ?

_exptl_special_details
;
  ?
;

_diffrn_ambient_temperature       296(2)
_diffrn_radiation_wavelength      1.54180
_diffrn_radiation_type            CuK\a
_diffrn_radiation_source          'fine-focus sealed tube'
_diffrn_radiation_monochromator   graphite
_diffrn_measurement_device_type   ?
_diffrn_measurement_method        ?
_diffrn_detector_area_resol_mean  ?
_diffrn_standards_number          ?
_diffrn_standards_interval_count  ?
_diffrn_standards_interval_time   ?
_diffrn_standards_decay_%         ?
_diffrn_reflns_number             4146
_diffrn_reflns_av_R_equivalents   0.0000
_diffrn_reflns_av_sigmaI/netI     0.0236
_diffrn_reflns_limit_h_min        0
_diffrn_reflns_limit_h_max        12
_diffrn_reflns_limit_k_min        0
_diffrn_reflns_limit_k_max        22
_diffrn_reflns_limit_l_min        0
_diffrn_reflns_limit_l_max        27
_diffrn_reflns_theta_min          3.81
_diffrn_reflns_theta_max          64.96
_reflns_number_total              4146
_reflns_number_gt                 2985
_reflns_threshold_expression      >2sigma(I)

_computing_data_collection        ?
_computing_cell_refinement        ?
_computing_data_reduction         ?
_computing_structure_solution     'SHELXS-97 (Sheldrick, 1990)'
_computing_structure_refinement   'SHELXL-97 (Sheldrick, 1997)'
_computing_molecular_graphics     ?
_computing_publication_material   ?

_refine_special_details
;
  Refinement of F^2^ against ALL reflections.  The weighted R-factor wR and
  goodness of fit S are based on F^2^, conventional R-factors R are based
  on F, with F set to zero for negative F^2^. The threshold expression of
  F^2^ > 2sigma(F^2^) is used only for calculating R-factors(gt) etc. and is
  not relevant to the choice of reflections for refinement.  R-factors based
  on F^2^ are statistically about twice as large as those based on F, and R-
  factors based on ALL data will be even larger.
;

_refine_ls_structure_factor_coef  Fsqd
_refine_ls_matrix_type            full
_refine_ls_weighting_scheme       calc
_refine_ls_weighting_details
  'calc w=1/[\s^2^(Fo^2^)+(0.0630P)^2^+1.5110P] where P=(Fo^2^+2Fc^2^)/3'
_atom_sites_solution_primary      direct
_atom_sites_solution_secondary    difmap
_atom_sites_solution_hydrogens    geom
_refine_ls_hydrogen_treatment     mixed
_refine_ls_extinction_method      SHELXL
_refine_ls_extinction_coef        0.00229(15)
_refine_ls_extinction_expression
  'Fc^*^=kFc[1+0.001xFc^2^\l^3^/sin(2\q)]^-1/4^'
_refine_ls_number_reflns          4146
_refine_ls_number_parameters      308
_refine_ls_number_restraints      0
_refine_ls_R_factor_all           0.0725
_refine_ls_R_factor_gt            0.0482
_refine_ls_wR_factor_ref          0.1324
_refine_ls_wR_factor_gt           0.1178
_refine_ls_goodness_of_fit_ref    1.116
_refine_ls_restrained_S_all       1.116
_refine_ls_shift/su_max           0.004
_refine_ls_shift/su_mean          0.000

loop_
  _atom_site_label
  _atom_site_type_symbol
  _atom_site_fract_x
  _atom_site_fract_y
  _atom_site_fract_z
  _atom_site_U_iso_or_equiv
  _atom_site_adp_type
  _atom_site_occupancy
  _atom_site_symmetry_multiplicity
  _atom_site_calc_flag
  _atom_site_refinement_flags
  _atom_site_disorder_assembly
  _atom_site_disorder_group
O1 O 0.43944(15) -0.00112(7) 0.36547(6) 0.0480(4) Uani 1 1 d . . .
O2 O 0.36958(14) -0.05033(8) 0.44872(6) 0.0461(4) Uani 1 1 d . . .
O3 O 0.60007(14) -0.22490(8) 0.46951(7) 0.0526(4) Uani 1 1 d . . .
O4 O 0.48608(14) -0.31191(8) 0.42900(6) 0.0508(4) Uani 1 1 d . . .
O5 O 0.34804(17) 0.04437(10) 0.50411(7) 0.0666(5) Uani 1 1 d . . .
O6 O 0.65948(18) -0.27726(10) 0.55031(8) 0.0768(6) Uani 1 1 d . . .
C7 C 0.3979(2) -0.06475(11) 0.38989(8) 0.0403(5) Uani 1 1 d . . .
C8 C 0.52757(19) -0.13347(12) 0.32242(9) 0.0425(5) Uani 1 1 d . . .
H8 H 0.5802 -0.0972 0.3059 0.051 Uiso 1 1 calc R . .
C9 C 0.29963(19) -0.15361(12) 0.32420(9) 0.0412(5) Uani 1 1 d . . .
H9 H 0.2268 -0.1670 0.3029 0.049 Uiso 1 1 calc R . .
C10 C 0.35965(18) -0.21809(11) 0.35522(8) 0.0395(5) Uani 1 1 d . . .
H10 H 0.3045 -0.2568 0.3644 0.047 Uiso 1 1 calc R . .
C11 C 0.43574(18) -0.19164(11) 0.40598(8) 0.0385(5) Uani 1 1 d . . .
H11 H 0.3850 -0.1840 0.4400 0.046 Uiso 1 1 calc R . .
O12 O 0.18691(15) -0.05812(9) 0.36544(8) 0.0620(5) Uani 1 1 d . . .
C13 C 0.49253(18) -0.12200(11) 0.38580(8) 0.0392(5) Uani 1 1 d . . .
H13 H 0.5635 -0.1102 0.4091 0.047 Uiso 1 1 calc R . .
C14 C 0.6041(2) -0.27960(13) 0.50620(10) 0.0508(6) Uani 1 1 d . . .
C15 C 0.5346(2) -0.24419(11) 0.41898(9) 0.0427(5) Uani 1 1 d . . .
C16 C 0.4167(2) 0.05657(12) 0.40464(9) 0.0486(6) Uani 1 1 d . . .
O17 O 0.72020(18) -0.27452(13) 0.37171(9) 0.0901(7) Uani 1 1 d . . .
C18 C 0.4415(2) -0.23050(11) 0.30063(9) 0.0431(5) Uani 1 1 d . . .
C19 C 0.28090(19) -0.08970(12) 0.35963(9) 0.0429(5) Uani 1 1 d . . .
C20 C 0.3525(2) -0.05189(13) 0.21986(10) 0.0574(6) Uani 1 1 d . . .
H20A H 0.3998 -0.0201 0.2435 0.069 Uiso 1 1 calc R . .
H20B H 0.2710 -0.0526 0.2352 0.069 Uiso 1 1 calc R . .
C21 C 0.41339(19) -0.15254(11) 0.28517(9) 0.0423(5) Uani 1 1 d . . .
C22 C 0.4055(2) -0.12493(12) 0.22413(9) 0.0506(6) Uani 1 1 d . . .
H22A H 0.4859 -0.1245 0.2075 0.061 Uiso 1 1 calc R . .
H22B H 0.3565 -0.1570 0.2015 0.061 Uiso 1 1 calc R . .
C23 C 0.5738(2) -0.21149(12) 0.31518(9) 0.0457(5) Uani 1 1 d . . .
H23 H 0.6273 -0.2168 0.2818 0.055 Uiso 1 1 calc R . .
C24 C 0.4096(2) -0.29179(12) 0.26248(10) 0.0533(6) Uani 1 1 d . . .
H24A H 0.4488 -0.2855 0.2254 0.064 Uiso 1 1 calc R . .
H24B H 0.3231 -0.2916 0.2559 0.064 Uiso 1 1 calc R . .
C25 C 0.5343(3) 0.09583(15) 0.41555(12) 0.0677(7) Uani 1 1 d . . .
H25A H 0.5601 0.1184 0.3806 0.102 Uiso 1 1 calc R . .
H25B H 0.5951 0.0631 0.4280 0.102 Uiso 1 1 calc R . .
H25C H 0.5219 0.1307 0.4449 0.102 Uiso 1 1 calc R . .
C26 C 0.5270(2) -0.33852(12) 0.48339(9) 0.0496(6) Uani 1 1 d . . .
C27 C 0.3743(2) 0.01983(13) 0.45848(9) 0.0473(5) Uani 1 1 d . . .
C28 C 0.6233(2) -0.24618(14) 0.36748(11) 0.0531(6) Uani 1 1 d . . .
C29 C 0.3187(3) 0.10425(15) 0.38143(12) 0.0760(8) Uani 1 1 d . . .
H29A H 0.3468 0.1272 0.3471 0.114 Uiso 1 1 calc R . .
H29B H 0.2987 0.1391 0.4099 0.114 Uiso 1 1 calc R . .

H29C H 0.2483 0.0768 0.3726 0.114 Uiso 1 1 calc R . .
C30 C 0.4456(2) -0.36296(12) 0.28674(11) 0.0576(6) Uani 1 1 d . . .
H30A H 0.5327 -0.3677 0.2847 0.069 Uiso 1 1 calc R . .
H30B H 0.4225 -0.3651 0.3270 0.069 Uiso 1 1 calc R . .
C31 C 0.3876(3) -0.42382(14) 0.25491(13) 0.0748(8) Uani 1 1 d . . .
H31A H 0.4146 -0.4675 0.2713 0.112 Uiso 1 1 calc R . .
H31B H 0.4100 -0.4220 0.2150 0.112 Uiso 1 1 calc R . .
H31C H 0.3014 -0.4206 0.2583 0.112 Uiso 1 1 calc R . .
C32 C 0.3491(3) -0.02400(18) 0.15870(12) 0.0807(9) Uani 1 1 d . . .
H32A H 0.3106 0.0213 0.1583 0.121 Uiso 1 1 calc R . .
H32B H 0.3046 -0.0560 0.1347 0.121 Uiso 1 1 calc R . .
H32C H 0.4300 -0.0196 0.1443 0.121 Uiso 1 1 calc R . .
C33 C 0.5998(3) -0.40479(17) 0.47482(16) 0.1002(12) Uani 1 1 d . . .
H33A H 0.5482 -0.4415 0.4606 0.150 Uiso 1 1 calc R . .
H33B H 0.6344 -0.4190 0.5109 0.150 Uiso 1 1 calc R . .
H33C H 0.6631 -0.3960 0.4475 0.150 Uiso 1 1 calc R . .
C34 C 0.4196(3) -0.3495(2) 0.52214(13) 0.1012(13) Uani 1 1 d . . .
H34A H 0.3706 -0.3870 0.5072 0.152 Uiso 1 1 calc R . .
H34B H 0.3727 -0.3070 0.5237 0.152 Uiso 1 1 calc R . .
H34C H 0.4468 -0.3614 0.5602 0.152 Uiso 1 1 calc R . .

loop_
  _atom_site_aniso_label
  _atom_site_aniso_U_11
  _atom_site_aniso_U_22
  _atom_site_aniso_U_33
  _atom_site_aniso_U_23
  _atom_site_aniso_U_13
  _atom_site_aniso_U_12
O1 0.0640(10) 0.0409(8) 0.0390(8) -0.0018(6) 0.0020(7) -0.0043(7)
O2 0.0558(9) 0.0478(9) 0.0348(8) -0.0015(6) 0.0016(7) -0.0004(7)
O3 0.0518(9) 0.0516(10) 0.0545(9) 0.0027(7) -0.0166(8) -0.0069(8)
O4 0.0626(10) 0.0457(9) 0.0440(8) 0.0057(7) -0.0150(7) -0.0097(8)
O5 0.0798(13) 0.0713(12) 0.0488(10) -0.0188(9) 0.0009(9) 0.0088(10)
O6 0.0877(14) 0.0763(13) 0.0664(12) 0.0038(10) -0.0413(11) -0.0015(11)
C7 0.0473(12) 0.0415(12) 0.0321(10) -0.0010(8) 0.0014(9) -0.0034(9)
C8 0.0380(11) 0.0462(12) 0.0434(11) 0.0041(9) 0.0040(9) -0.0038(10)
C9 0.0348(11) 0.0516(13) 0.0372(11) -0.0035(9) -0.0030(9) -0.0029(10)
C10 0.0371(11) 0.0438(12) 0.0375(11) -0.0003(9) -0.0010(9) -0.0051(9)
C11 0.0361(11) 0.0436(12) 0.0358(11) -0.0002(9) 0.0026(9) -0.0039(9)
O12 0.0455(10) 0.0684(12) 0.0721(12) -0.0126(9) -0.0045(9) 0.0141(8)
C13 0.0368(11) 0.0426(12) 0.0382(11) 0.0002(9) -0.0025(9) -0.0045(9)
C14 0.0509(14) 0.0542(14) 0.0475(13) 0.0024(11) -0.0115(11) 0.0054(11)
C15 0.0431(11) 0.0448(12) 0.0400(11) 0.0020(9) -0.0059(9) -0.0051(10)
C16 0.0590(14) 0.0441(13) 0.0429(12) -0.0061(10) -0.0098(11) 0.0032(11)
O17 0.0589(12) 0.1238(19) 0.0876(14) 0.0271(13) 0.0115(10) 0.0387(12)
C18 0.0460(12) 0.0470(13) 0.0362(11) -0.0019(9) 0.0027(9) -0.0007(10)
C19 0.0426(12) 0.0482(13) 0.0378(11) -0.0003(9) -0.0008(9) 0.0028(10)
C20 0.0679(16) 0.0592(15) 0.0450(13) 0.0036(11) -0.0012(12) 0.0040(13)
C21 0.0430(12) 0.0496(13) 0.0344(10) -0.0020(9) 0.0024(9) -0.0001(10)
C22 0.0583(14) 0.0577(14) 0.0360(11) -0.0008(10) 0.0035(10) 0.0023(12)
C23 0.0400(12) 0.0529(14) 0.0442(12) 0.0020(10) 0.0106(10) 0.0008(10)
C24 0.0639(15) 0.0514(14) 0.0445(13) -0.0066(10) 0.0006(12) 0.0011(12)
C25 0.0825(19) 0.0604(16) 0.0601(15) -0.0021(13) -0.0082(14) -0.0202(15)
C26 0.0580(14) 0.0473(13) 0.0434(12) 0.0055(10) -0.0139(11) -0.0004(11)
C27 0.0465(12) 0.0551(14) 0.0401(12) -0.0078(10) -0.0069(10) 0.0068(11)
C28 0.0416(12) 0.0585(14) 0.0593(14) 0.0042(11) 0.0048(11) 0.0054(11)
C29 0.096(2) 0.0637(18) 0.0688(17) -0.0032(14) -0.0204(16) 0.0251(16)
C30 0.0612(15) 0.0532(15) 0.0585(15) -0.0061(12) 0.0057(12) 0.0012(12)
C31 0.097(2) 0.0565(16) 0.0712(17) -0.0162(14) 0.0122(16) -0.0048(16)
C32 0.101(2) 0.086(2) 0.0550(16) 0.0213(15) 0.0038(16) 0.0187(18)
C33 0.122(3) 0.0596(18) 0.119(3) -0.0118(18) -0.055(2) 0.0307(19)
C34 0.095(2) 0.144(3) 0.0647(19) 0.022(2) -0.0015(18) -0.047(2)

_geom_special_details

;
  All esds (except the esd in the dihedral angle between two l.s. planes)
  are estimated using the full covariance matrix.  The cell esds are taken
  into account individually in the estimation of esds in distances, angles
  and torsion angles; correlations between esds in cell parameters are only
  used when they are defined by crystal symmetry.  An approximate (isotropic)
  treatment of cell esds is used for estimating esds involving l.s. planes.
;

loop_
  _geom_bond_atom_site_label_1
  _geom_bond_atom_site_label_2
  _geom_bond_distance
  _geom_bond_site_symmetry_2
  _geom_bond_publ_flag
O1 C7 1.412(2) . ?
O1 C16 1.445(3) . ?
O2 C27 1.352(3) . ?
O2 C7 1.427(2) . ?
O3 C14 1.344(3) . ?
O3 C15 1.426(2) . ?
O4 C15 1.413(3) . ?
O4 C26 1.433(3) . ?
O5 C27 1.192(3) . ?
O6 C14 1.194(3) . ?
C7 C13 1.513(3) . ?
C7 C19 1.548(3) . ?
C8 C13 1.536(3) . ?
C8 C21 1.574(3) . ?
C8 C23 1.576(3) . ?
C9 C19 1.480(3) . ?
C9 C21 1.551(3) . ?
C9 C10 1.568(3) . ?
C10 C11 1.533(3) . ?
C10 C18 1.575(3) . ?
C11 C15 1.512(3) . ?
C11 C13 1.537(3) . ?
O12 C19 1.209(3) . ?
C14 C26 1.504(3) . ?
C15 C28 1.547(3) . ?
C16 C27 1.506(3) . ?
C16 C29 1.513(3) . ?
C16 C25 1.522(3) . ?
O17 C28 1.205(3) . ?
C18 C24 1.504(3) . ?
C18 C23 1.546(3) . ?
C18 C21 1.555(3) . ?
C20 C22 1.509(3) . ?
C20 C32 1.515(3) . ?
C21 C22 1.512(3) . ?
C23 C28 1.485(3) . ?
C24 C30 1.517(3) . ?
C26 C34 1.505(4) . ?
C26 C33 1.508(4) . ?
C30 C31 1.514(4) . ?

loop_
  _geom_angle_atom_site_label_1
  _geom_angle_atom_site_label_2
  _geom_angle_atom_site_label_3
  _geom_angle
  _geom_angle_site_symmetry_1
  _geom_angle_site_symmetry_3
  _geom_angle_publ_flag
C7 O1 C16 109.87(16) . . ?
C27 O2 C7 109.93(16) . . ?
C14 O3 C15 109.80(17) . . ?
C15 O4 C26 110.23(16) . . ?
O1 C7 O2 106.91(16) . . ?
O1 C7 C13 111.34(17) . . ?
O2 C7 C13 110.49(16) . . ?
O1 C7 C19 110.67(17) . . ?
O2 C7 C19 107.98(16) . . ?
C13 C7 C19 109.37(17) . . ?
C13 C8 C21 110.79(16) . . ?
C13 C8 C23 108.49(17) . . ?
C21 C8 C23 89.21(16) . . ?
C19 C9 C21 115.27(18) . . ?
C19 C9 C10 116.41(17) . . ?
C21 C9 C10 86.20(15) . . ?
C11 C10 C9 109.24(17) . . ?
C11 C10 C18 110.50(16) . . ?
C9 C10 C18 89.53(15) . . ?
C15 C11 C10 109.57(17) . . ?
C15 C11 C13 109.41(16) . . ?
C10 C11 C13 105.85(16) . . ?
C7 C13 C8 109.68(16) . . ?
C7 C13 C11 108.39(16) . . ?
C8 C13 C11 105.83(16) . . ?
O6 C14 O3 122.1(2) . . ?
O6 C14 C26 128.4(2) . . ?
O3 C14 C26 109.48(18) . . ?
O4 C15 O3 106.98(16) . . ?
O4 C15 C11 111.01(17) . . ?
O3 C15 C11 111.27(17) . . ?
O4 C15 C28 110.26(18) . . ?
O3 C15 C28 108.51(17) . . ?
C11 C15 C28 108.78(17) . . ?
O1 C16 C27 102.97(18) . . ?
O1 C16 C29 110.80(19) . . ?
C27 C16 C29 110.4(2) . . ?
O1 C16 C25 109.1(2) . . ?
C27 C16 C25 110.87(19) . . ?
C29 C16 C25 112.3(2) . . ?
C24 C18 C23 122.09(19) . . ?
C24 C18 C21 123.65(18) . . ?
C23 C18 C21 91.02(16) . . ?
C24 C18 C10 116.99(19) . . ?
C23 C18 C10 109.57(16) . . ?
C21 C18 C10 85.86(15) . . ?
O12 C19 C9 126.1(2) . . ?
O12 C19 C7 121.2(2) . . ?
C9 C19 C7 112.66(18) . . ?
C22 C20 C32 113.1(2) . . ?
C22 C21 C9 120.26(19) . . ?
C22 C21 C18 123.89(18) . . ?
C9 C21 C18 90.89(16) . . ?
C22 C21 C8 118.72(18) . . ?
C9 C21 C8 109.59(16) . . ?
C18 C21 C8 86.07(16) . . ?
C20 C22 C21 113.73(19) . . ?
C28 C23 C18 115.13(18) . . ?
C28 C23 C8 116.72(19) . . ?
C18 C23 C8 86.28(16) . . ?
C18 C24 C30 114.18(19) . . ?
O4 C26 C14 103.12(18) . . ?
O4 C26 C34 109.0(2) . . ?
C14 C26 C34 110.0(2) . . ?
O4 C26 C33 110.3(2) . . ?
C14 C26 C33 111.3(2) . . ?
C34 C26 C33 112.7(3) . . ?
O5 C27 O2 121.6(2) . . ?
O5 C27 C16 129.1(2) . . ?
O2 C27 C16 109.24(18) . . ?
O17 C28 C23 126.4(2) . . ?
O17 C28 C15 120.9(2) . . ?
C23 C28 C15 112.65(18) . . ?
C31 C30 C24 112.8(2) . . ?

loop_
  _geom_torsion_atom_site_label_1
  _geom_torsion_atom_site_label_2
  _geom_torsion_atom_site_label_3
  _geom_torsion_atom_site_label_4
  _geom_torsion
  _geom_torsion_site_symmetry_1
  _geom_torsion_site_symmetry_2
  _geom_torsion_site_symmetry_3
  _geom_torsion_site_symmetry_4
  _geom_torsion_publ_flag
C16 O1 C7 O2 -10.8(2) . . . . ?
C16 O1 C7 C13 -131.54(18) . . . . ?
C16 O1 C7 C19 106.59(19) . . . . ?
C27 O2 C7 O1 9.2(2) . . . . ?
C27 O2 C7 C13 130.53(18) . . . . ?
C27 O2 C7 C19 -109.90(19) . . . . ?
C19 C9 C10 C11 -25.2(2) . . . . ?
C21 C9 C10 C11 91.17(17) . . . . ?
C19 C9 C10 C18 -136.84(18) . . . . ?
C21 C9 C10 C18 -20.43(15) . . . . ?
C9 C10 C11 C15 -154.61(17) . . . . ?
C18 C10 C11 C15 -57.6(2) . . . . ?
C9 C10 C11 C13 -36.7(2) . . . . ?
C18 C10 C11 C13 60.2(2) . . . . ?
O1 C7 C13 C8 -57.8(2) . . . . ?
O2 C7 C13 C8 -176.43(16) . . . . ?
C19 C7 C13 C8 64.8(2) . . . . ?
O1 C7 C13 C11 -172.89(15) . . . . ?
O2 C7 C13 C11 68.5(2) . . . . ?
C19 C7 C13 C11 -50.3(2) . . . . ?
C21 C8 C13 C7 -57.2(2) . . . . ?
C23 C8 C13 C7 -153.61(17) . . . . ?
C21 C8 C13 C11 59.5(2) . . . . ?
C23 C8 C13 C11 -36.9(2) . . . . ?
C15 C11 C13 C7 -163.61(16) . . . . ?
C10 C11 C13 C7 78.41(19) . . . . ?
C15 C11 C13 C8 78.8(2) . . . . ?
C10 C11 C13 C8 -39.2(2) . . . . ?
C15 O3 C14 O6 176.1(2) . . . . ?
C15 O3 C14 C26 -6.0(3) . . . . ?
C26 O4 C15 O3 -4.3(2) . . . . ?
C26 O4 C15 C11 -125.88(19) . . . . ?
C26 O4 C15 C28 113.5(2) . . . . ?
C14 O3 C15 O4 6.4(2) . . . . ?
C14 O3 C15 C11 127.83(19) . . . . ?
C14 O3 C15 C28 -112.5(2) . . . . ?
C10 C11 C15 O4 -55.3(2) . . . . ?
C13 C11 C15 O4 -170.90(16) . . . . ?
C10 C11 C15 O3 -174.29(16) . . . . ?
C13 C11 C15 O3 70.1(2) . . . . ?
C10 C11 C15 C28 66.2(2) . . . . ?
C13 C11 C15 C28 -49.4(2) . . . . ?
C7 O1 C16 C27 8.1(2) . . . . ?
C7 O1 C16 C29 -110.0(2) . . . . ?
C7 O1 C16 C25 125.9(2) . . . . ?
C11 C10 C18 C24 144.05(19) . . . . ?
C9 C10 C18 C24 -105.5(2) . . . . ?
C11 C10 C18 C23 -0.4(2) . . . . ?
C9 C10 C18 C23 110.00(18) . . . . ?
C11 C10 C18 C21 -90.02(18) . . . . ?
C9 C10 C18 C21 20.39(15) . . . . ?
C21 C9 C19 O12 133.9(2) . . . . ?
C10 C9 C19 O12 -127.4(2) . . . . ?
C21 C9 C19 C7 -45.6(2) . . . . ?
C10 C9 C19 C7 53.2(2) . . . . ?
O1 C7 C19 O12 -69.3(3) . . . . ?
O2 C7 C19 O12 47.4(3) . . . . ?
C13 C7 C19 O12 167.6(2) . . . . ?
O1 C7 C19 C9 110.1(2) . . . . ?
O2 C7 C19 C9 -133.16(18) . . . . ?
C13 C7 C19 C9 -12.9(2) . . . . ?
C19 C9 C21 C22 -90.9(2) . . . . ?
C10 C9 C21 C22 151.6(2) . . . . ?
C19 C9 C21 C18 138.20(18) . . . . ?
C10 C9 C21 C18 20.71(15) . . . . ?
C19 C9 C21 C8 52.0(2) . . . . ?
C10 C9 C21 C8 -65.44(18) . . . . ?
C24 C18 C21 C22 -28.9(3) . . . . ?
C23 C18 C21 C22 101.7(2) . . . . ?
C10 C18 C21 C22 -148.8(2) . . . . ?
C24 C18 C21 C9 99.3(2) . . . . ?
C23 C18 C21 C9 -130.17(15) . . . . ?
C10 C18 C21 C9 -20.62(15) . . . . ?
C24 C18 C21 C8 -151.2(2) . . . . ?
C23 C18 C21 C8 -20.60(15) . . . . ?
C10 C18 C21 C8 88.95(15) . . . . ?
C13 C8 C21 C22 143.82(19) . . . . ?
C23 C8 C21 C22 -106.7(2) . . . . ?
C13 C8 C21 C9 0.2(2) . . . . ?
C23 C8 C21 C9 109.73(18) . . . . ?
C13 C8 C21 C18 -89.33(18) . . . . ?
C23 C8 C21 C18 20.18(15) . . . . ?
C32 C20 C22 C21 178.0(2) . . . . ?
C9 C21 C22 C20 53.7(3) . . . . ?
C18 C21 C22 C20 168.1(2) . . . . ?
C8 C21 C22 C20 -86.0(3) . . . . ?
C24 C18 C23 C28 -89.9(3) . . . . ?
C21 C18 C23 C28 138.4(2) . . . . ?
C10 C18 C23 C28 52.4(3) . . . . ?
C24 C18 C23 C8 152.3(2) . . . . ?
C21 C18 C23 C8 20.56(15) . . . . ?
C10 C18 C23 C8 -65.41(18) . . . . ?
C13 C8 C23 C28 -24.9(2) . . . . ?
C21 C8 C23 C28 -136.64(19) . . . . ?
C13 C8 C23 C18 91.40(17) . . . . ?
C21 C8 C23 C18 -20.30(15) . . . . ?
C23 C18 C24 C30 64.0(3) . . . . ?
C21 C18 C24 C30 -179.8(2) . . . . ?
C10 C18 C24 C30 -75.8(3) . . . . ?
C15 O4 C26 C14 0.9(2) . . . . ?
C15 O4 C26 C34 117.7(2) . . . . ?
C15 O4 C26 C33 -118.1(2) . . . . ?
O6 C14 C26 O4 -179.0(3) . . . . ?
O3 C14 C26 O4 3.2(3) . . . . ?
O6 C14 C26 C34 64.9(4) . . . . ?
O3 C14 C26 C34 -112.9(2) . . . . ?
O6 C14 C26 C33 -60.8(4) . . . . ?
O3 C14 C26 C33 121.4(2) . . . . ?
C7 O2 C27 O5 176.3(2) . . . . ?
C7 O2 C27 C16 -4.2(2) . . . . ?
O1 C16 C27 O5 177.2(2) . . . . ?
C29 C16 C27 O5 -64.5(3) . . . . ?
C25 C16 C27 O5 60.6(3) . . . . ?
O1 C16 C27 O2 -2.3(2) . . . . ?
C29 C16 C27 O2 116.0(2) . . . . ?
C25 C16 C27 O2 -118.9(2) . . . . ?
C18 C23 C28 O17 133.9(3) . . . . ?
C8 C23 C28 O17 -127.1(3) . . . . ?
C18 C23 C28 C15 -45.0(3) . . . . ?
C8 C23 C28 C15 54.0(3) . . . . ?
O4 C15 C28 O17 -71.2(3) . . . . ?
O3 C15 C28 O17 45.7(3) . . . . ?
C11 C15 C28 O17 166.9(3) . . . . ?
O4 C15 C28 C23 107.8(2) . . . . ?
O3 C15 C28 C23 -135.4(2) . . . . ?
C11 C15 C28 C23 -14.2(3) . . . . ?
C18 C24 C30 C31 166.6(2) . . . . ?

_diffrn_measured_fraction_theta_max    1.000
_diffrn_reflns_theta_full              64.96
_diffrn_measured_fraction_theta_full   1.000
_refine_diff_density_max    0.271
_refine_diff_density_min   -0.192
_refine_diff_density_rms    0.063
